# Supplementary material
Source: Springer Nature journal article supplement (https://www.springermedizin.de/resource/supplementary/12943_2014_1320_MOESM12_ESM.pdf/9552714)
Supplement: MOESM12 [file 9552714]

A)

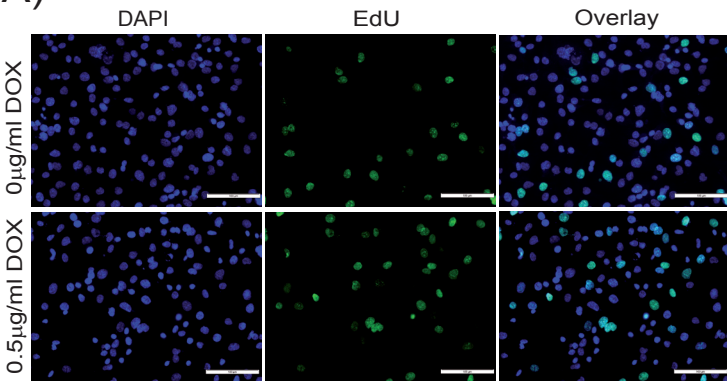

B)

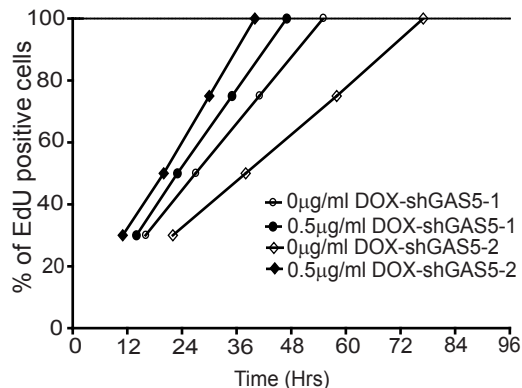

C)

Time in hours needed to label 30, 50, 75 & 100% of cells with EdU

| % of EdU + | shGAS5-1   |              | shGAS5-2               |              |
|------------|------------|--------------|------------------------|--------------|
|            | 0ug/ml DOX | 0.5ug/ml DOX | 0 $\mu\text{g/ml}$ DOX | 0.5ug/ml DOX |
| 30         | 16         | 14           | 22                     | 11           |
| 50         | 27         | 23           | 38                     | 20           |
| 75         | 41         | 35           | 58                     | 30           |
| 100        | 55         | 47           | 77                     | 40           |
